# Supplementary material
Source: PubMed Central journal article supplement (PMC9907344)
Supplement: jamanetwopen-e222037-s003.pdf [file jamanetwopen-e222037-s003.pdf]

## Data Sharing Statement

Inoue. Association of Intensive Blood Pressure Control and Living Arrangement on Cardiovascular Outcomes by Race. *JAMA Netw Open*. Published March 14, 2022. doi:10.1001/jamanetworkopen.2022.2037

### Data

**Data available:** No

### Additional Information

**Explanation for why data not available:** This is a secondary analysis of SPRINT randomized controlled trial, and all data are already available at <https://biolincc.nhlbi.nih.gov/studies/sprint/>. There is no data collected particularly for our study.
